# Supplementary material for: A Qualitative Study Evaluating the Occupational Safety and Health Management System from Perspective of Health Workers Exposure to Blood-Borne Pathogen
Source: Research Square preprint supplement (doi:10.21203/rs.3.rs-8390768/v1), 2026-01-16
Supplement: Supplementary file 1 [file 4a0cdbb310ce7765baadbf6e.docx]

File 1:

# Consolidated criteria for reporting qualitative studies (COREQ) checklist1

| **Topic** | **Item No.** | **Guide Questions/Description** | **Reported on Page No.** |
| --- | --- | --- | --- |
| **Domain 1: Research Team and Reﬂexivity** | | | |
| *Personal Characteristics* |  |  |  |
| Interviewer/facilitator | 1 | Which author/s conducted the interview or focus group? | WS,YH, YT,CH |
| Credentials | 2 | What were the researcher’s credentials? e.g. PhD, MD | Title page |
| Occupation | 3 | What was their occupation at the time of the study? | PHD candidate/Master degree candidate |
| Gender | 4 | Was the researcher male or female? | female |
| Experience and training | 5 | What experience or training did the researcher have? | Master/University degree, practical experience |
| *Relationship with Participants* |  |  |  |
| Relationship established | 6 | Was a relationship established prior to study commencement? | 2.3.1 Interview data collection |
| Participant knowledge of the interviewer | 7 | What did the participants know about the researcher? e.g. personal goals, reasons for doing the research | 2.3.1 Interview data collection |
| Interviewer characteristics | 8 | What characteristics were reported about the interviewer/facilitator? e.g. bias, assumptions, reasons and interests in the research topic | N/A |
| **Domain 2: Study Design** |  |  |  |
| *Theoretical Framework* |  |  |  |
| Methodological orientation and theory | 9 | What methodological orientation was stated to underpin the study? e.g. grounded theory, discourse analysis, ethnography, phenomenology, content analysis | 2.3.3 Data coding and analysis |
| *Participant selection* |  |  |  |
| Sampling | 10 | How were participants selected? e.g. purposive, convenience, consecutive, snowball | 2.3.1 Interview data collection |

| Method of approach | 11 | How were participants approached? e.g. face-to-face, telephone, mail, email | 2.3.1 Interview data collection |
| --- | --- | --- | --- |
| Sample size | 12 | How many participants were in the study? | 2.3.2 Interviewee characteristics |
| Non-participation | 13 | How many people refused to participate or dropped out? Reasons? | None |
| *Setting* |  |  |  |
| Setting of data collection | 14 | Where was the data collected? e.g. home, clinic, workplace | 2.3.1 Interview data collection |
| Presence of non-participants | 15 | Was anyone else present besides the participants and researchers? | 2.3.1 Interview data collection |
| Description of sample | 16 | What are the important characteristics of the sample? e.g. demographic data, date | 2.3.2 Interviewee characteristics |
| *Data Collection* |  |  |  |
| Interview guide | 17 | Were questions, prompts, guides provided by the authors? Was it pilot tested? | 2.3.1 Interview data collection |
| Repeat interviews | 18 | Were repeat interviews carried out? If yes, how many? | No |
| Audio/visual recording | 19 | Did the research use audio or visual recording to collect the data? | 2.3.3 Data coding and analysis |
| Field notes | 20 | Were field notes made during and/or after the interview or focus group | 2.3.1 Interview data collection |
| Duration | 21 | What was the duration of the interviews or focus group? | 2.3.1 Interview data collection |
| Data saturation | 22 | Was data saturation discussed? | 2.3.1 Interview data collection |
| Transcripts returned | 23 | Were transcripts returned to participants for comment and/or correction? | 2.3.3 Data coding and analysis |

| **Domain 3: Analysis and Findings** | | | |
| --- | --- | --- | --- |
| *Data Analysis* |  |  |  |
| Number of data coders | 24 | How many data coders coded the data? | 2.3.3 Data coding and analysis |
| Description of the coding tree | 25 | Did authors provide a description of the coding tree? | 2.3.3 Data coding and analysis |
| Derivation of themes | 26 | Were themes identified in advance or derived from the data? | 2.3.3 Data coding and analysis |
| Software | 27 | What software, if applicable, was used to manage the data? | 2.3.3 Data coding and analysis |
| Participant checking | 28 | Did participants provide feedback on the findings? | No |
| Reporting |  |  |  |
| Quotations presented | 29 | Were participant quotations presented to illustrate the themes/findings? Was each quotation identified? e.g. participant number | Results, all paragraphs |
| Data and findings consistent | 30 | Was there consistency between the data presented and the findings? | Discussion |
| Clarity of major themes | 31 | Were major themes clearly presented in the findings? | Results |
| Clarity of minor themes | 32 | Is there a description of diverse cases or discussion of minor  themes? | Results |

1.TongA, Sainsbury P, Craig J. Consolidated criteria for reporting qualitative research (COREQ): a 32 -item checklist for interviews and focus groups. IntJ Qual Health Care 2007; 19(6):349 - 357

File 2:

# Codebook and verbatim supporting each theme/subtheme

| Themes | Subthemes | Codes | *Verbatim* |
| --- | --- | --- | --- |
| 1. Incidents | 1.1 exposure frequency | 1.1.1 one episode | *“I experienced once during my ICU internship, which I promptly reported. The exposure occurred due to a percutaneous injury sustained while manually opening a glass ampoule. Since then, I have adopted safer handling techniques, such as using ampoule openers or protective tools, effectively minimizing the risk of OBPE.” (Infusion Room Nurse, P42 NUR)* |
| 1.1.2 two or three episodes | *“I likely experienced two to three episodes of OBPE within the preceding year, although I am unable to recall the exact dates of occurrence. I believe I reported the incidents to the infection and control department.” (Dentist, P21DOC)* |
| 1.1.3 more than three episodes | *“If exposure to patients' body fluids is included in the definition of OBPE, such incidents occur frequently in clinical practice due to unpredictable events like sudden vomiting or coughing during patient care. However, sharp instrument injuries remain relatively infrequent. Despite the frequency of mucocutaneous exposures, I have only reported once to the infection and control department, as minor exposures are often perceived as low-risk and therefore not reported, such as vomitus splashing onto the hands.” (Internal Medicine, P2 NUR)* |
| 2. Immune status | 2.1 aware | 2.1.1 Completed hepatitis B vaccination and tested HBsAb(+) | *“Prior to the OBPE, I was aware that I was positive for HbsAb, but negative for anti-HCV. I also confirmed that I had not received hepatitis B vaccination previously.” (Cardiovascular Nurse, P15NUR)* |
| 2.1.2 Not completed or received hepatitis B vaccination but HBsAb(+) |
| 2.1.3 Not completed or received hepatitis B vaccination and HBsAb(-) |
| 2.1.4 Unsure completed or received hepatitis B vaccination but HBsAb(+) |
| 2.2 unaware | 2.2.1 Completed hepatitis B vaccination and unsure HBsAb status | *“I received the complete three-dose hepatitis B vaccination series during childhood as part of the national immunization program, and subsequently received booster doses prior to employment. However, I was unaware of my HBsAb status at the time of OBPE.”(Neonatal Nurse, P9**NUR)* |
| 2.2.2 Not completed or received hepatitis B vaccination and unsure HBsAb status |
| 2.2.3 Unsure completed or received hepatitis B vaccination and unsure HBsAb status |
| 2.3 unique situation | | *“I have experienced two episodes of OBPE. My immune status during the first exposure was uncertain. By the time of the second exposure, I had completed the hepatitis B vaccination series and tested positive for HBsAb, indicating established immunity.” (Intern of Traditional Chinese Medicine, P20DOC)* |
| 3.1 the impact on the mental health | 3.1.1 slight concerns | *“Initially, I experienced minimal concern following the incident, as a preliminary risk assessment and screening indicated a low likelihood of direct exposure to blood-borne pathogens. The initial evaluation process typically takes approximately three days. Subsequently, I underwent a second round of screening while awaiting confirmation of the results.” (Urology Nurse, P30NUR)* |
| 3.1.2 intense tension, anxiety,and stress | *“At the time, I experienced a degree of anxiety, accompanied by a psychosomatic sensation similar to being pricked by needles. The source patient’s laboratory results were not entirely negative, which contributed to my heightened psychological distress.” (Burn Department Nurse, P25NUR)* |
| 3.1.3 no impact on psychologicalwell-being | *“I did not experience significant psychological distress following the exposure. However, the emotional impact largely depends on the infection status of the source patient. When the patient is not known to carry any high-risk infectious diseases and the prognosis is favorable, the psychological burden is minimal. Conversely, if the source is confirmed to have a serious communicable disease, it is natural to experience a period of heightened anxiety and emotional stress.” (Surgeon, P22DOC)* |
| 3.2 coping strategies to manage psychological distress | 3.2.1 emotional support | *“I adopted a pragmatic mindset, recognizing that since the exposure had already occurred, the appropriate course of action was to confront the situation. Having completed the incident reporting process and initiated post-exposure prophylactic measures, I proceeded to await the diagnostic results to determine the potential outcome.” (Urology Nurse, P30NUR)**“Following OBPE, most individuals typically engage in self-regulation, informally debrief with colleagues, and, in cases of significant psychological or physical impact, may take medical leave to recover.”(Oral Surgery Doctor, P22DOC)* *“From the time of OBPE to the confirmation of the source patient's examination results, it is common to experience a certain degree of concern or anxiety. Therefore, employing distraction techniques or redirecting attention can be an effective coping strategy to alleviate psychological stress during this period.” (Surgeon, P23DOC)* |
| 3.2.2 self-assessment |
| 3.2.3 self-comfort strategies |
| 3.3 the impact on the physical health | 3.3.1 negative impacts on individualwell-being | *“In the week following the OBPE, I experienced significant sleep disturbances, including insomnia and recurrent intrusive recollections of the incident. Rumination about the event often prevented me from falling asleep. I experienced feelings of regret, attributing the exposure to a momentary lapse in vigilance, and believed the incident might have been preventable with greater caution.”(Obstetrics and Gynecology Doctor, P8DOC)* |
| 3.3.2 negative impacts onwork performance | *“Following the incident, I experienced cognitive symptoms such as impaired concentration and forgetfulness during work. In more severe cases, affected individuals may require medical leave to facilitate psychological recovery and reduce occupational stress.”(Oral Surgery Doctor, P24DOC)* |
| 3.3.3 negative impacts oninterpersonal attitudes | *“I experienced emotional exhaustion and noted changes in my interpersonal behavior at work, including discomfort in social interactions and a reduced willingness to engage in communication with others.”(Surgeon, P25NUR)* |
| 4. Measures | 4.1 current measures | 4.1.1 organizational management | *“If there is a situation, the hospital's infection department has contacted me many times. If I have any problems, I can also contact them, and they will also help me contact psychological counseling.”(Emergency department intern, P31DOC)* |
| 4.1.2 cultural development | *“As a third-party outsourcing company, we handle a demanding and labor-intensive workload, including tasks such as implementing the seven-step hand hygiene protocol, managing hand sanitizer distribution, and maintaining high cleanliness standards. Our efforts are deeply appreciated by HWs, who often express their gratitude with sentiments like, 'Auntie, you’re doing an excellent job; without you, the hospital wouldn’t be so clean.' Hearing such words fills us with a profound sense of warmth and pride.”(HuaBaoSheng, Cleaning Manager, P55)* |
| 4.1.3 training and education | *“The hospital provides robust training on OBPE, with at least three sessions mandated: one during system-wide orientation and another upon each six-month departmental rotation. However, the curriculum is narrowly focused on post-exposure management. There is a notable lack of training on pre-exposure prophylaxis and the psychological support for affected staff, not to mention updates on international guidelines and theories. ”(Clinical Laboratory Technologist, P41TEC)* |
| 4.1.4 specialized research and development | *“All nurses and interns in our department are required to dispose of sharp instruments exclusively in the improved curved blade tray or in the designated sharps disposal containers. Regardless of workload or time constraints, under no circumstances should sharps be left unattended or discarded improperly. Such negligence poses a serious safety hazard to patients, support staff, medical waste handlers, and caregivers.” ( Intensive Care Unit Nurse, P35NUR)* |
| 4.2 effective measures | 4.2.1 adhered to standardprevention protocols | *“After OBPE, I promptly administered PEP with penicillin as an immediate precautionary measure. I prioritized exposure management before proceeding to formally report the incident. After reporting, I adhered to the infection control protocol established by our hospital’s Infection Control Department. Subsequently, I coordinated with our nursing staff to ensure that the patient received the appropriate injections as part of the necessary follow-up care.”(Oncology Nurse, P9NUR)* |
| 4.2.2 hospital-level measures | *“HWs who experience OBPE in the course of their daily work are advised to report the incident to the department assistant. Psychological concerns related to such exposures may also be reported. If the incident significantly impacts working, it can be escalated to the hospital. However, the specific procedures for how the hospital handles such cases remain unclear to me, as I have not submitted a report regarding this issue.”(Rehabilitation Medicine Technologist, P40TEC)*  *“I am aware that the hospital has a psychological counseling department staffed with professional counselors. It appears to be located within the outpatient department. However, as I have not sought consultation there before, I do not have a detailed understanding of its services or procedures.” (Gynecologist, P7DOC)* |
| 4.2.3 identified gaps |
| Plans | 5.1 hospital-level interventions | 5.1.1 Strengthening organizational management | *“Despite a comprehensive reporting system, the procedure is complex and time-consuming, which discourages me from reporting incidents.” (Emergency Department Nurse, P32NUR)* |
| 5.1.2 Strengthening cultural initiatives | *“OBPE is a common occurrence on the front lines of clinical work. When my students encountered OBPE, I actively provided guidance, offered reassurance, and conducted proactive psychological support to help them handle the situation effectively.” (Surgery Department Nurse, P27NUR)* |
| 5.1.3 Reducing workplace hazards | *“Since the implementation of the “6S” management system, the hospital environment has significantly improved. The Security Department conducts daily patrols to identify potential risks, while the Infection and Control Department regularly inspects safety hazards across all departments. Identified risks are documented and reported, with continuous follow-up until they are effectively resolved.” (Operating Room Nurse, P34NUR)* |
| 5.1.4 Improving emergency response capacity | *“On-call personnel shall be arranged during holiday periods to ensure the immediate handling of any OBPE incidents, thus avoiding undue panic or irreversible consequences.” (Surgeon, P37DOC)* |
| 5.1.5 Strengthening post-exposure support | *“Timely post-exposure management requires us to cover the cost of vaccination and immunoglobulin ourselves, as our hospital is not a designated treatment facility. We must also contact physicians at the designated hospital, schedule an appointment, and travel there for the injection. This process is cumbersome and time-consuming, which poses challenges to prompt and effective management.”(Surgical Intern, P43)* |
| 5.2 individual-level interventions | 5.2.1 Raise awareness | *“When I experienced OBPE, I felt quite anxious. I promptly performed emergency post-exposure management and reported the incident according to protocol. At the same time, I reflected on my shortcomings and recognized the importance of strengthening my awareness and adherence to standard precautions. Moving forward, I will exercise greater caution and precision in all clinical procedures to minimize the risk of future incidents.” (Surgical Nurse, P29**NUR)* |
| 5.2.2 Strength proactive actions |
| 5.2.3 Improve communication skills | *“The source patient had just been admitted and had not yet undergone serological testing. The head nurse accompanied me to communicate with the patient friendly, who expressed understanding and willingly consented to the testing.”(Internal Medicine Nurse, P24NUR)* |
